# Supplementary material
Source: publisher figshare collection journal article supplement (https://acs.figshare.com/ndownloader/files/3814024)

## Supporting Information

### **Manuscript title:**

Stable knock-down of efflux transporters leads to reduced glucuronidation in UGT1A1-overexpressing HeLa cells: the evidence for glucuronidation-transport interplay

### **Authors:**

Xingwang Zhang, Dong Dong, Huailing Wang, Zhiguo Ma, Yifei Wang and Baojian Wu

### **Journal name:**

Molecular Pharmaceutics

**Figure S1** Kinetic profiles for glucuronidation reactions mediated by HeLa1A1 cell lysate. **(A)** Kinetic profile for glucuronidation of genistein by HeLa1A1 cell lysate. **(B)** Kinetic profile for glucuronidation of apigenin by HeLa1A1 cell lysate. **(B)** Kinetic profile for glucuronidation of emodin by HeLa1A1 cell lysate. Each data point was the average of three determinations with error bar representing the standard deviation. The units for the kinetic parameters  $K_m$ ,  $K_{si}$ , and  $V_{max}$  were  $\mu\text{M}$ ,  $\mu\text{M}$ , and  $\text{nmol}/\text{min}/\text{mg}$ , respectively.

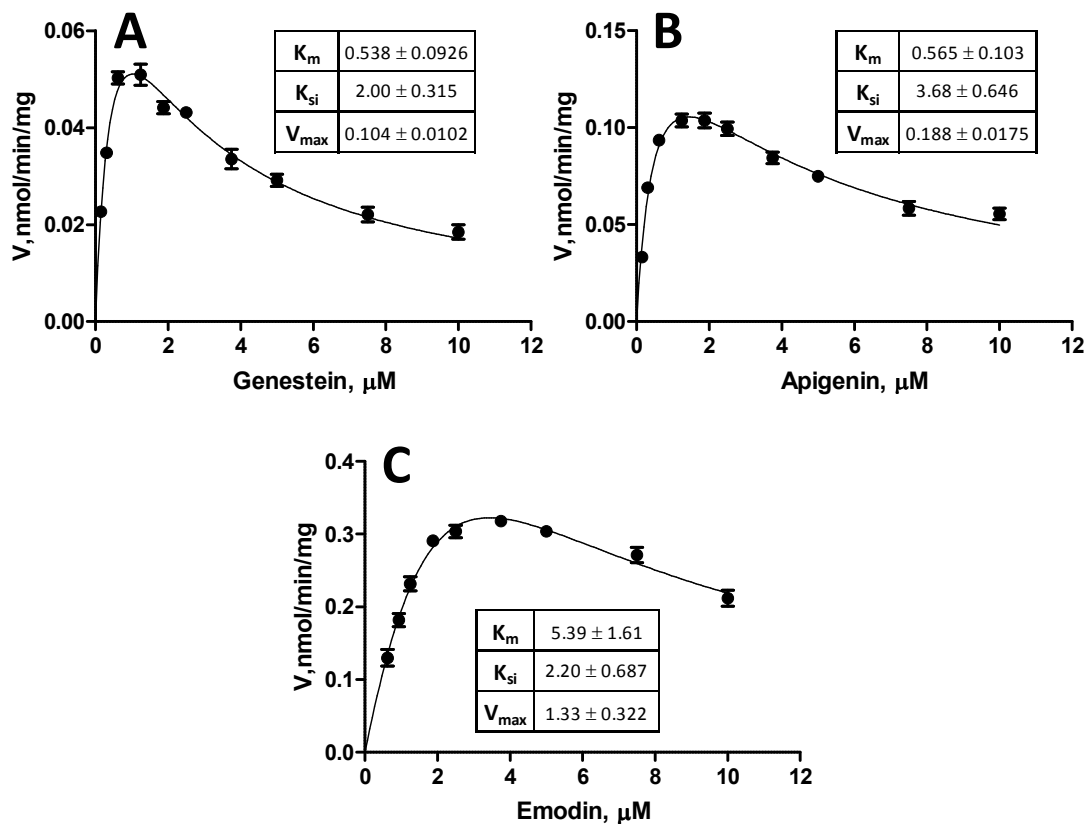

Supplement: Supplementary file 1 [file 3814024]
